# Supplementary material
Source: PubMed Central journal article supplement (PMC3064199)
Supplement: supp_M110.211417_jbc.M110.211417-2.pdf [file supp_M110.211417_jbc.M110.211417-2.pdf]

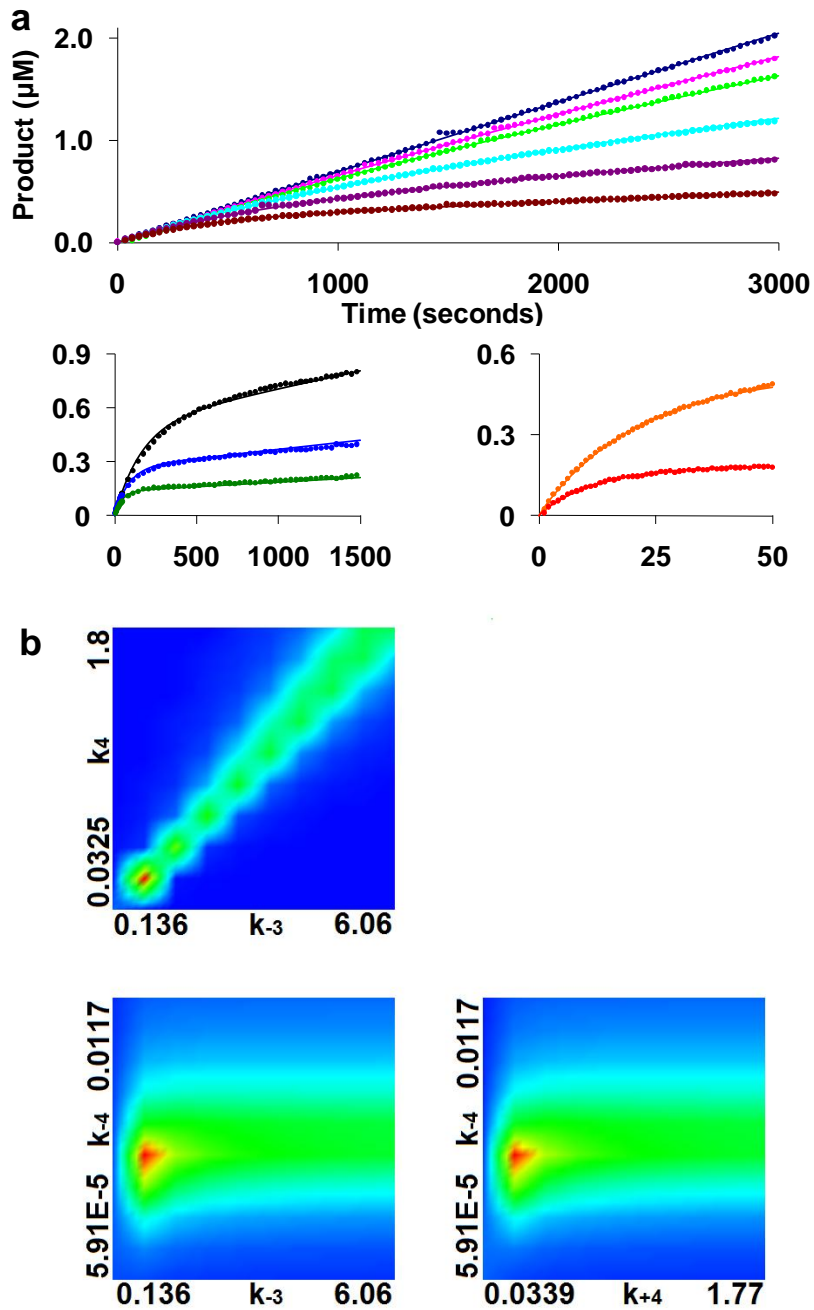

**Supplemental Figure 2.** Analysis of the activity data fit to a two-step binding mechanism. (a) The activity data fit to the two-step binding mechanism (Fig. 6b). The fitted curves are nearly indistinguishable from those for the one-step binding mechanism (Fig. 5a, Fig. 6a). (b) Poorly constrained parameters for the two-step binding mechanism illustrated by the confidence contour analysis plots of  $k_3$  vs  $k_4$ ,  $k_3$  vs  $k_{-4}$  and  $k_4$  vs  $k_{-4}$ . Note the expanded scale of the axes relative to the well-constrained fit shown in Figure 5b.
